# Supplementary material for: Green Nut Oil or DHA Supplementation Restored Decreased Distribution Levels of DHA Containing Phosphatidylcholines in the Brain of a Mouse Model of Dementia
Source: MDPI journal article supplement (doi:10.3390/metabo10040153), 2020-04-16
Supplement: s1 [file s1]

## Supplementary Materials

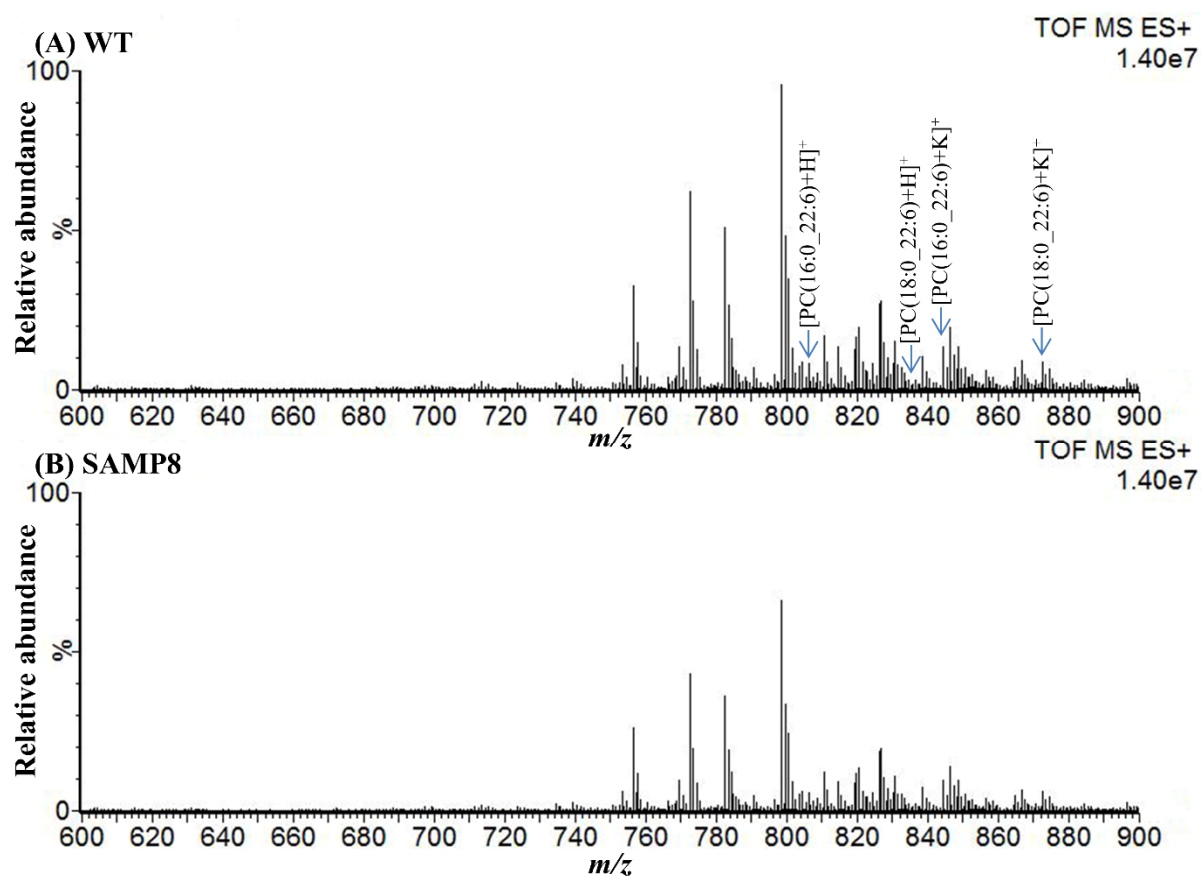

**Figure S1:** Representative mass spectra of DESI-MSI acquired in positive ionization mode from the sagittal brain sections of 14-week-old WT and SAMP8 mice. WT: wild type mice; SAMP8: senescence accelerated mouse prone 8; PC: phosphatidylcholine and  $m/z$ : mass to charge ratio.

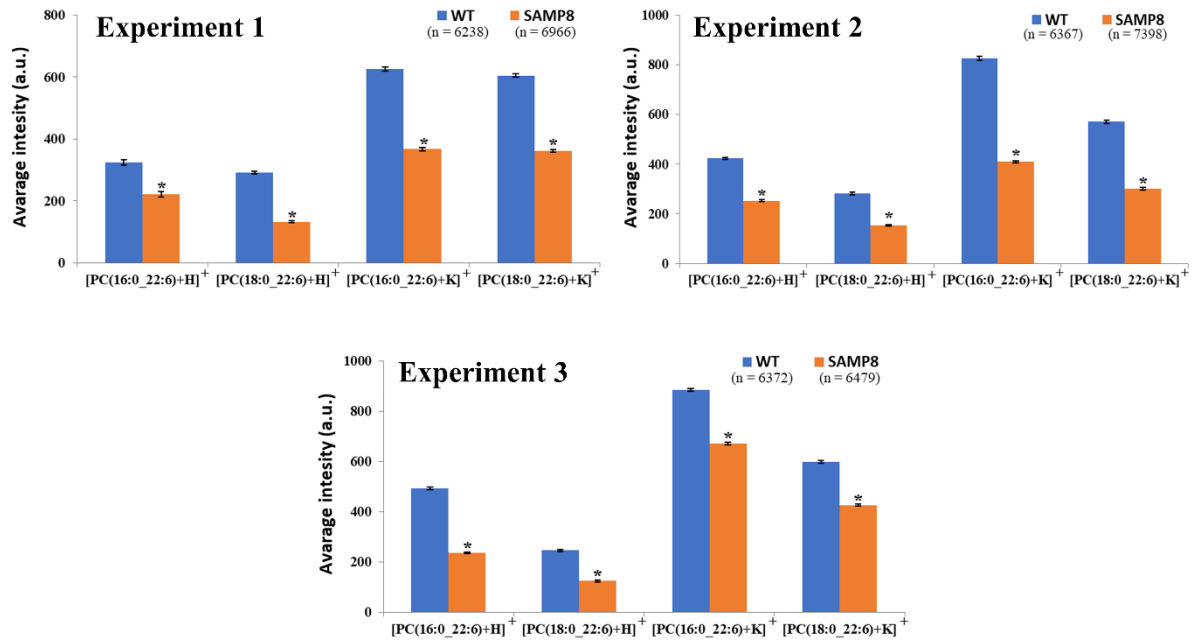

**Figure S2:** Average intensity of the distribution of DHA-PCs in the brain of 14-week-old WT and SAMP8 mice (data from three independent experiments). All values are expressed as mean  $\pm$  SEM. Here 'a.u.' indicates arbitrary unit, 'n' indicates number of pixels, and '\*' indicates  $P < 0.05$  compared to WT mice (two tailed t-test).

**Table S1:** Fold decreases in the average intensity of the distribution of DHA-PCs in different brain regions of 14-week-old SAMP8 mice compared to WT mice.

| <b>DHA containing phosphatidylcholines</b> |                                      |                                      |                                      |                                      |
|--------------------------------------------|--------------------------------------|--------------------------------------|--------------------------------------|--------------------------------------|
| <b>Brain regions</b>                       | <b>[PC(16:0_22:6)+H]<sup>+</sup></b> | <b>[PC(18:0_22:6)+H]<sup>+</sup></b> | <b>[PC(16:0_22:6)+K]<sup>+</sup></b> | <b>[PC(18:0_22:6)+K]<sup>+</sup></b> |
| Cerebellum (Cb)                            | 1.58 ± 0.26                          | 2.49 ± 0.24                          | 1.8 ± 0.16                           | 1.99 ± 0.22                          |
| Cerebral Cortex (Cx)                       | 2.3 ± 0.23                           | 1.9 ± 0.23                           | 2.29 ± 0.34                          | 1.45 ± 0.10                          |
| Hippocampus (Hip)                          | 2.51 ± 0.22                          | 2.08 ± 0.09                          | 1.67 ± 0.12                          | 1.78 ± 0.13                          |
| Caudate putamen (Cp)                       | 2.37 ± 0.01                          | 2.14 ± 0.18                          | 1.94 ± 0.19                          | 2.08 ± 0.17                          |
| Ventral striatum (Vs)                      | 1.99 ± 0.15                          | 2.00 ± 0.12                          | 1.79 ± 0.15                          | 1.48 ± 0.10                          |

All values are expressed as mean ± SEM (n = 3; mice number)

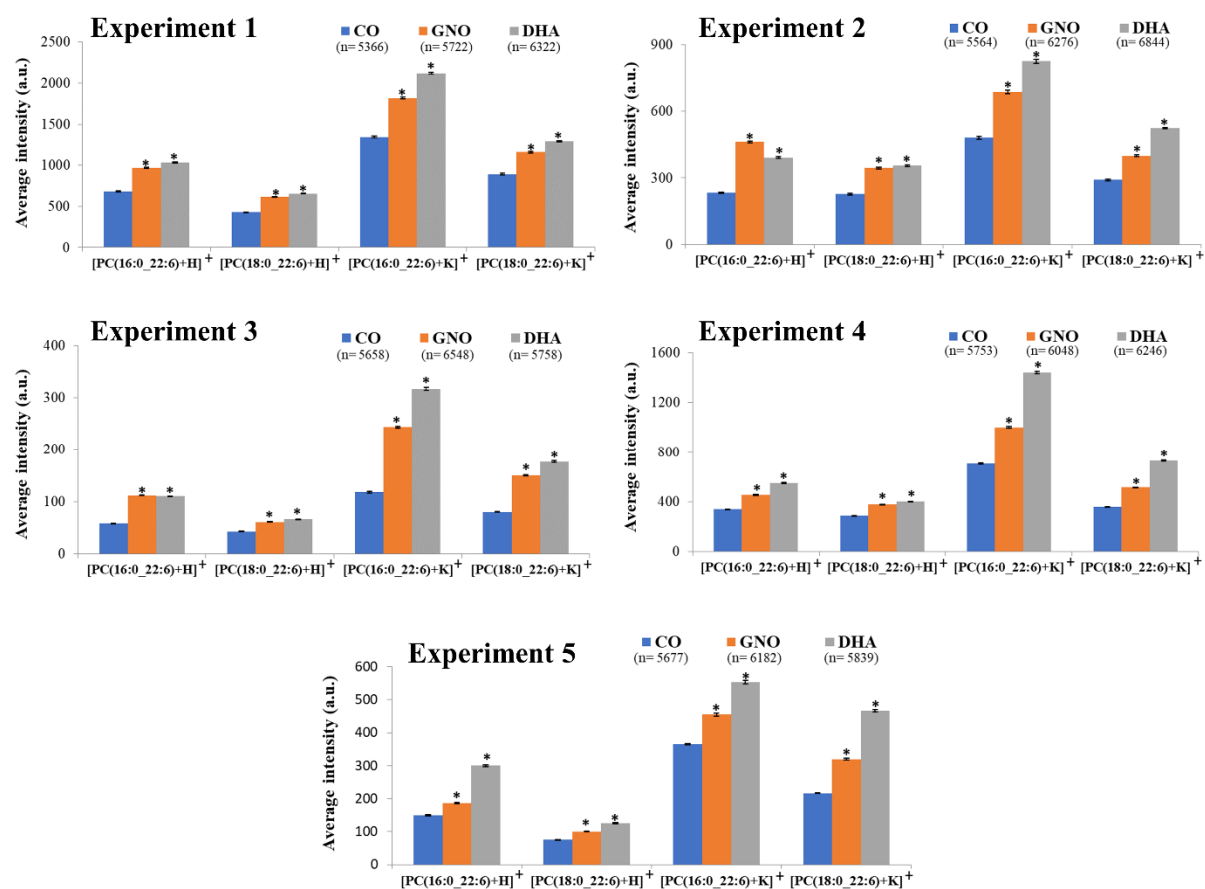

**Figure S3:** Average intensity of the distribution of DHA-PCs in the brain of 28-week-old CO, GNO, and DHA treated SAMP8 mice (data from five independent experiments). All values are expressed as mean  $\pm$  SEM. CO: corn oil fed SAMP8 mice; GNO: green nut oil fed SAMP8 mice and DHA: DHA fed SAMP8 mice. Here 'a.u.' indicates arbitrary unit, 'n' indicates number of pixels, and '\*' indicates  $P < 0.05$  compared to CO-fed SAMP8 mice (one-way ANOVA with Tukey's multiple comparisons).

**Table S2:** Fold increases in the average intensity of the distribution of DHA-PCs in different brain regions of GNO or DHA treated SAMP8 mice (28 weeks old) compared to CO treated SAMP8 mice.

| Brain regions          | DHA containing phosphatidylcholines |                                |                                |                                |
|------------------------|-------------------------------------|--------------------------------|--------------------------------|--------------------------------|
| GNO treated SAMP8 mice | [PC(16:0_22:6)+H] <sup>+</sup>      | [PC(18:0_22:6)+H] <sup>+</sup> | [PC(16:0_22:6)+K] <sup>+</sup> | [PC(18:0_22:6)+K] <sup>+</sup> |
| Cerebellum (Cb)        | 1.33 ± 0.09                         | 1.46 ± 0.08                    | 1.56 ± 0.14                    | 1.50 ± 0.15                    |
| Cerebral Cortex (Cx)   | 1.56 ± 0.19                         | 1.42 ± 0.04                    | 1.79 ± 0.16                    | 1.61 ± 0.07                    |
| Hippocampus (Hip)      | 1.71 ± 0.33                         | 1.36 ± 0.10                    | 2.08 ± 0.66                    | 1.92 ± 0.41                    |
| Caudate putamen (Cp)   | 1.99 ± 0.35                         | 1.63 ± 0.08                    | 2.10 ± 0.48                    | 1.98 ± 0.37                    |
| Ventral striatum (Vs)  | 1.97 ± 0.27                         | 1.59 ± 0.08                    | 1.79 ± 0.24                    | 1.81 ± 0.22                    |
| GNO treated SAMP8 mice |                                     |                                |                                |                                |
| Cerebellum (Cb)        | 1.43 ± 0.13                         | 1.59 ± 0.14                    | 2.02 ± 0.18                    | 1.93 ± 0.17                    |
| Cerebral Cortex (Cx)   | 1.68 ± 0.21                         | 1.62 ± 0.08                    | 2.50 ± 0.29                    | 1.93 ± 0.16                    |
| Hippocampus (Hip)      | 1.89 ± 0.23                         | 1.90 ± 0.38                    | 2.55 ± 0.57                    | 2.11 ± 0.36                    |
| Caudate putamen (Cp)   | 2.25 ± 0.40                         | 1.75 ± 0.17                    | 2.24 ± 0.42                    | 1.99 ± 0.38                    |
| Ventral striatum (Vs)  | 2.38 ± 0.37                         | 1.89 ± 0.03                    | 2.21 ± 0.32                    | 2.05 ± 0.31                    |

All values are expressed as mean ± SEM (n = 5; mice number)
