# Supplementary material for: Green Nut Oil or DHA Supplementation Restored Decreased Distribution Levels of DHA Containing Phosphatidylcholines in the Brain of a Mouse Model of Dementia
Source: Metabolites. 2020 Apr 16;10(4):153. doi: 10.3390/metabo10040153 (PMC7240946; doi:10.3390/metabo10040153)
Supplement: Supplementary file 1 [file metabolites-10-00153-s001.zip]

Archive with 4 entries (4 files):
- Figure S1.tif
- Figure S2.tif
- Figure S3.tif
- Supplementary_Materials.pdf
